# Supplementary material for: Design and molecular dynamics of multifunctional sulfonated poly(dimethylaminoethyl methacrylate)/mica hybrid cryogels through freezing-induced gelation
Source: Royal Society of Chemistry journal article supplement (doi:10.1039/c9sm01534e), 2019-01-01
Supplement: c9sm01534e1.pdf [file c9sm01534e1.pdf]

## Supporting information for

### Design and molecular dynamics of multifunctional sulfonated poly(dimethylaminoethyl methacrylate)/mica hybrid cryogels through freezing-induced gelation

Nur Sena OKTEN,<sup>a,b</sup> Beril TANC,<sup>a</sup> and Nermin Orakdogen<sup>a\*</sup>

<sup>a</sup>Istanbul Technical University, Department of Chemistry, Soft Materials Research Laboratory, 34469, Maslak, Istanbul, Turkey.

<sup>b</sup>Istanbul Kultur University, Department of Civil Engineering, 34158, Bakırkoy, Istanbul, Turkey.

\*Correspondence to: Prof. Nermin Orakdogen (e-mail: [orakdogen@itu.edu.tr](mailto:orakdogen@itu.edu.tr))

#### Compressive elasticity of hybrid gels

Samples were loaded using a vertically fitted circular probe, having 40 mm diameter, and moving at a constant speed. After each active deformation period, the compressive force  $f$  acting on the gel samples was calculated by reading the mass change of the sample from the balance  $m$ , as  $f = mg$ , where  $g$  is the gravitational acceleration ( $g = 9.803 \text{ m/s}^2$ ). By displacement control, the change in the length of the sample,  $\Delta L$ , was recorded by readings data from a digital comparator (IDC type Digimatic Indicator 543-262, Mitutoyo) which was sensitive to the displacements of  $10^{-3} \text{ mm}$  and was calculated as  $\Delta L = L_0 - L$ , where  $L_0$  and  $L$  are the initial undeformed and deformed lengths, respectively. Three experimental variations during the elasticity measurement are: (1) each compressive loading was conducted up to about 20% compression of the initial length, (2) after each loading, the sample was held under compression for 10 s of relaxation and (3) each testing was carried out in  $\leq 3 \text{ min}$  to avoid the loss of water during the measurement. Throughout each compressive loading, stress and strain were continuously recorded and stress-strain graphs were plotted according to the following linear dependence.

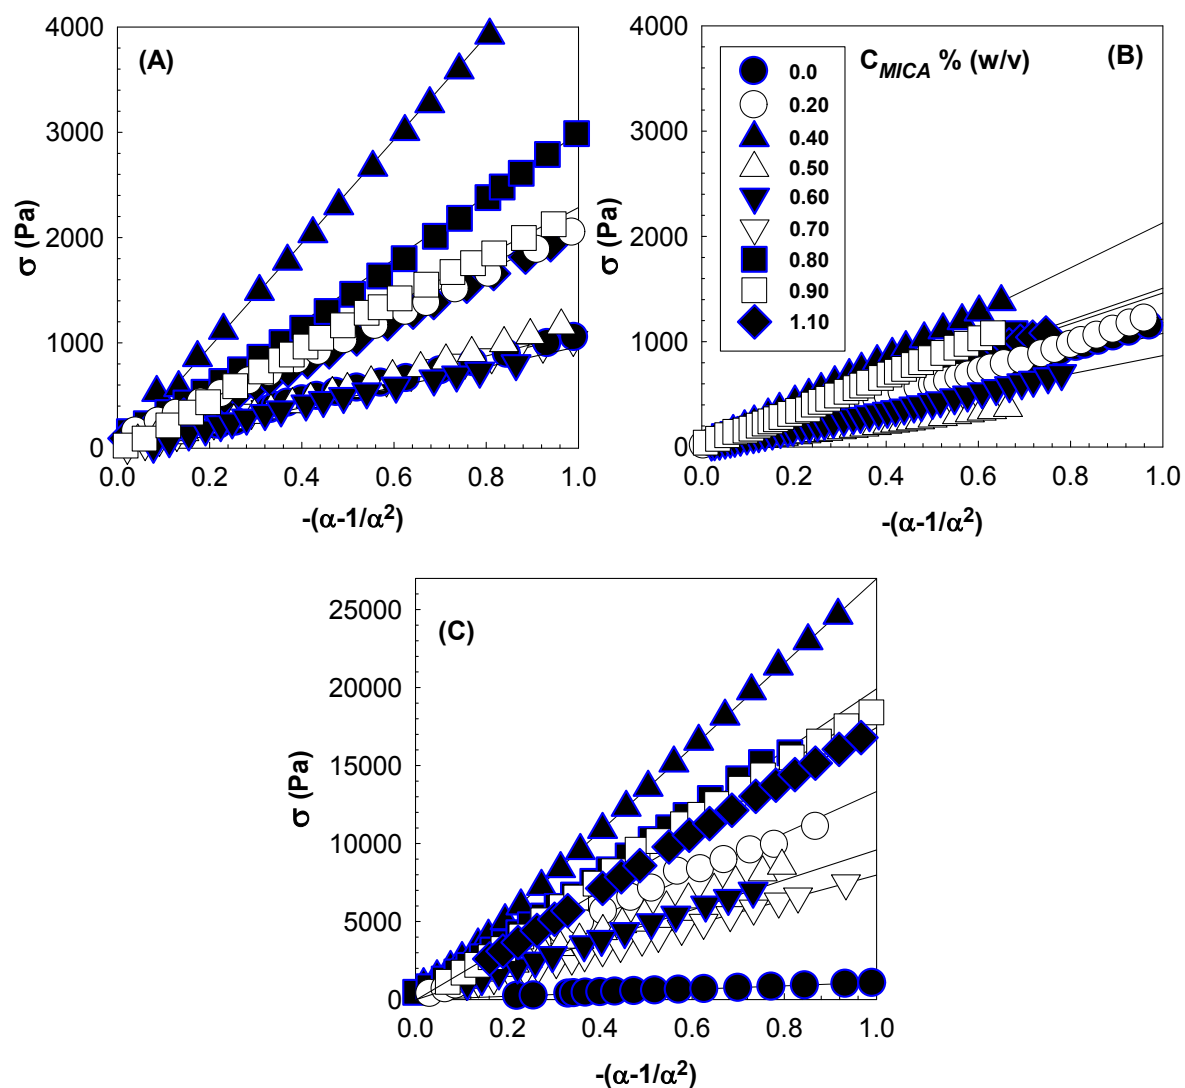

**Figure S1.** Typical stress - strain isotherms of hybrid MICAm/PDA-HGel as-prepared state (A), after their equilibrium swelling in water (B) and that of hybrid MICAm/PDA-CGel after equilibrium swelling in water (C). Mica contents (in % w/v) are indicated in the figure.

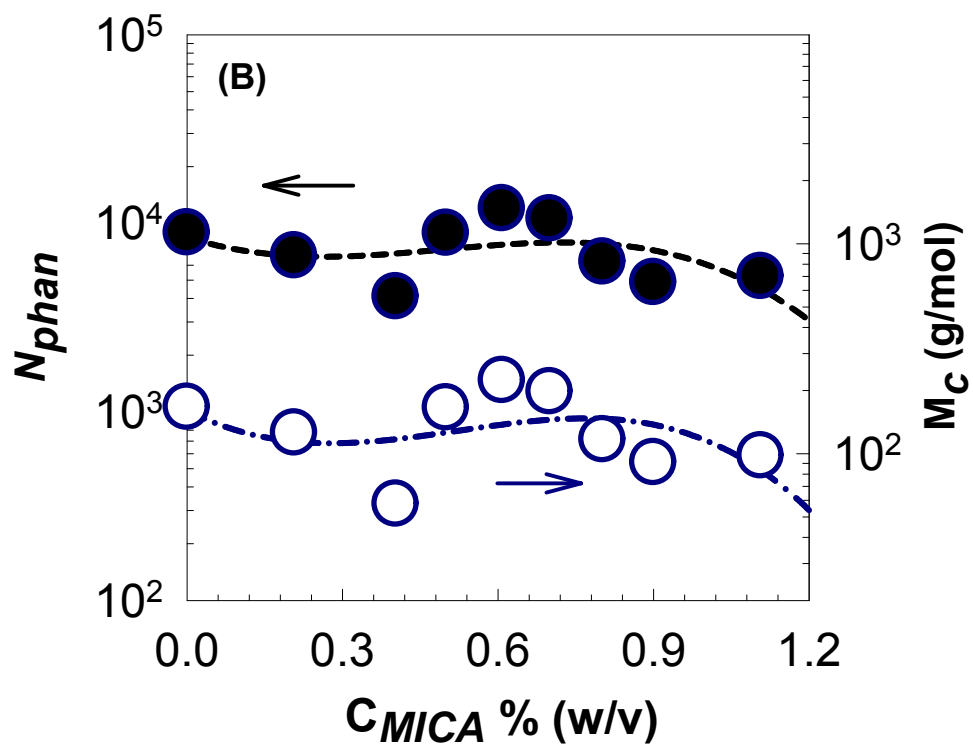

**Figure S2.** Variation of the average network chain length  $N$  (solid symbols) and  $M_c$  (open symbols) in the hybrid hydrogel network of MICAm/PDA-HGel as a function of mica content.
